# Supplementary material for: Comparative proteomic analysis of hypertrophic chondrocytes in osteoarthritis
Source: PubMed Central journal article supplement (PMC4415313; doi:10.1186/s12014-015-9085-6), 2015-04-25
Supplement: 12014_2015_9085_MOESM2_ESM.pdf [file 12014_2015_9085_MOESM2_ESM.pdf]

Additional File 3. Cluster 2

| CLUSTER 2 - Protein Set for normal chondrocytes |         |                      |                        |
|-------------------------------------------------|---------|----------------------|------------------------|
|                                                 | Uniprot | Gene Symbol          | Enrez Gene ID          |
| Proteins "Under-represented" in OA chondrocytes | P16112  | ACAN                 | <a href="#">176</a>    |
|                                                 | P21810  | BGN                  | <a href="#">633</a>    |
|                                                 | P02743  | APCS                 | <a href="#">325</a>    |
|                                                 | P02458  | COL2A1               | <a href="#">1280</a>   |
|                                                 | Q92743  | HTRA1                | <a href="#">5654</a>   |
|                                                 | P14555  | PLA2G2A              | <a href="#">5320</a>   |
|                                                 | O60565  | GREM1                | <a href="#">26585</a>  |
| Proteins Uniquely identified in Controls        | P02649  | APOE                 | <a href="#">348</a>    |
|                                                 | P55107  | GDF10                | <a href="#">2662</a>   |
|                                                 | P01009  | SERPINA1             | <a href="#">5265</a>   |
|                                                 | Q6UXX5  | ITIH6                | <a href="#">347365</a> |
|                                                 | P01024  | C3                   | <a href="#">718</a>    |
|                                                 | Q9UKU9  | ANGPTL2              | <a href="#">23452</a>  |
|                                                 | Q16674  | MIA                  | <a href="#">8190</a>   |
|                                                 | Q9NRR1  | CYTL1                | <a href="#">54360</a>  |
|                                                 | P34096  | RNASE4               | <a href="#">6038</a>   |
|                                                 | P02741  | CRP                  | <a href="#">1401</a>   |
| Q9UQ26                                          | RIMS2   | <a href="#">9699</a> |                        |
