# Supplementary material for: Comparative proteomic analysis of hypertrophic chondrocytes in osteoarthritis
Source: PubMed Central journal article supplement (PMC4415313; doi:10.1186/s12014-015-9085-6), 2015-04-25
Supplement: 12014_2015_9085_MOESM3_ESM.pdf [file 12014_2015_9085_MOESM3_ESM.pdf]

| CLUSTER 1 - Protein Set for OA chondrocytes    |         |                       |                        |
|------------------------------------------------|---------|-----------------------|------------------------|
|                                                | Uniprot | Gene Symbol           | Enrez Gene ID          |
| Proteins "Over-represented" in OA chondrocytes | P21980  | TGM2                  | <a href="#">7052</a>   |
|                                                | O94925  | GLS                   | <a href="#">2744</a>   |
|                                                | P50454  | SERPINH1              | <a href="#">871</a>    |
|                                                | P16070  | CD44                  | <a href="#">960</a>    |
|                                                | P33527  | ABCC1                 | <a href="#">4363</a>   |
|                                                | P04216  | THY1                  | <a href="#">7070</a>   |
|                                                | Q9UM22  | EPDR1                 | <a href="#">54749</a>  |
|                                                | Q16698  | DECR1                 | <a href="#">1666</a>   |
|                                                | Q14764  | MVP                   | <a href="#">9961</a>   |
|                                                | P07900  | HSP90AA1              | <a href="#">3320</a>   |
|                                                | Q9UBS4  | DNAJB11               | <a href="#">51726</a>  |
|                                                | P32119  | PRDX2                 | <a href="#">7001</a>   |
|                                                | P50995  | ANXA11                | <a href="#">311</a>    |
|                                                | Q9NZM1  | MYOF                  | <a href="#">26509</a>  |
|                                                | P02545  | LMNA                  | <a href="#">4000</a>   |
|                                                | P08670  | VIM                   | <a href="#">7431</a>   |
|                                                | Q00325  | SLC25A3               | <a href="#">5250</a>   |
|                                                | P54652  | HSPA2                 | <a href="#">3306</a>   |
|                                                | Q99623  | PHB2                  | <a href="#">11331</a>  |
|                                                | P58546  | MTPN                  | <a href="#">136319</a> |
|                                                | Q9NQC3  | RTN4                  | <a href="#">57142</a>  |
|                                                | P08107  | <i>HSPA1B</i>         | <a href="#">3304</a>   |
|                                                | Q15067  | ACOX1                 | <a href="#">51</a>     |
|                                                | Q8IV08  | PLD3                  | <a href="#">23646</a>  |
|                                                | P14625  | HSP90B1               | <a href="#">7184</a>   |
|                                                | P04083  | ANXA1                 | <a href="#">301</a>    |
|                                                | Q9H8Y8  | GORASP2               | <a href="#">26003</a>  |
|                                                | Q6S8J3  | POTEE                 | <a href="#">445582</a> |
|                                                | P50990  | CCT8                  | <a href="#">10694</a>  |
|                                                | P28482  | MAPK1                 | <a href="#">5594</a>   |
|                                                | Q9BUT1  | BDH2                  | <a href="#">56898</a>  |
|                                                | P09211  | GSTP1                 | <a href="#">2950</a>   |
|                                                | P13797  | PLS3                  | <a href="#">5358</a>   |
|                                                | P07355  | ANXA2                 | <a href="#">302</a>    |
|                                                | P55145  | MANF                  | <a href="#">7873</a>   |
|                                                | P07099  | EPHX1                 | <a href="#">2052</a>   |
|                                                | P09382  | LGALS1                | <a href="#">3956</a>   |
|                                                | Q16658  | FSCN1                 | <a href="#">6624</a>   |
|                                                | P08133  | ANXA6                 | <a href="#">309</a>    |
|                                                | P05141  | SLC25A5               | <a href="#">292</a>    |
| Q13492                                         | PICALM  | <a href="#">8301</a>  |                        |
| Q8WX93                                         | PALLD   | <a href="#">23022</a> |                        |

## Additional File 4. Cluster 1

| Proteins "Over-represented" in OA chondrocytes | Protein ID | Protein Name | Count                  |
|------------------------------------------------|------------|--------------|------------------------|
|                                                | P35579     | MYH9         | <a href="#">4627</a>   |
|                                                | O94973     | AP2A2        | <a href="#">161</a>    |
|                                                | O43592     | XPOT         | <a href="#">11260</a>  |
|                                                | Q9NVA2     | SEPT11       | <a href="#">55752</a>  |
|                                                | P55072     | VCP          | <a href="#">7415</a>   |
|                                                | O95782     | AP2A1        | <a href="#">160</a>    |
|                                                | P06576     | ATP5B        | <a href="#">506</a>    |
|                                                | P07437     | TUBB         | <a href="#">203068</a> |
|                                                | P68104     | EEF1A1       | <a href="#">1915</a>   |
|                                                | P17655     | CAPN2        | <a href="#">824</a>    |
|                                                | P25705     | ATP5A1       | <a href="#">498</a>    |
|                                                | O60701     | UGDH         | <a href="#">7358</a>   |
|                                                | P07384     | CAPN1        | <a href="#">823</a>    |
|                                                | P61224     | RAP1B        | <a href="#">5908</a>   |
|                                                | Q15008     | PSMD6        | <a href="#">9861</a>   |
|                                                | Q7Z4H8     | KDEL2        | <a href="#">143888</a> |
|                                                | P49419     | ALDH7A1      | <a href="#">501</a>    |
|                                                | Q9Y6C9     | MTCH2        | <a href="#">23788</a>  |
|                                                | P29144     | TPP2         | <a href="#">7174</a>   |
|                                                | P05388     | RPLP0        | <a href="#">6175</a>   |
|                                                | P60842     | EIF4A1       | <a href="#">1973</a>   |
|                                                | P05023     | ATP1A1       | <a href="#">476</a>    |
|                                                | P63000     | RAC1         | <a href="#">5879</a>   |
|                                                | Q10567     | AP1B1        | <a href="#">162</a>    |
|                                                | P54920     | NAPA         | <a href="#">8775</a>   |
|                                                | P04899     | GNAI2        | <a href="#">2771</a>   |
|                                                | P31943     | HNRNPH1      | <a href="#">3187</a>   |
|                                                | O43759     | SYNGR1       | <a href="#">9145</a>   |
|                                                | Q9BQE3     | TUBA1C       | <a href="#">84790</a>  |
|                                                | Q9HAV0     | GNB4         | <a href="#">59345</a>  |
|                                                | Q9BSJ8     | ESYT1        | <a href="#">23344</a>  |
|                                                | Q01082     | SPTBN1       | <a href="#">6711</a>   |
|                                                | Q13813     | SPTAN1       | <a href="#">6709</a>   |
|                                                | Q9Y6N5     | SQRDL        | <a href="#">58472</a>  |
|                                                | P52209     | PGD          | <a href="#">5226</a>   |
|                                                | P06396     | GSN          | <a href="#">2934</a>   |
|                                                | Q00610     | CLTC         | <a href="#">1213</a>   |
|                                                | Q01995     | TAGLN        | <a href="#">6876</a>   |
|                                                | P47985     | UQCRFS1      | <a href="#">7386</a>   |
|                                                | P55884     | EIF3B        | <a href="#">8662</a>   |
|                                                | P07858     | CTSB         | <a href="#">1508</a>   |
|                                                | P0C0S8     | HIST1H2AG    | <a href="#">8969</a>   |
|                                                | P00387     | CYB5R3       | <a href="#">1727</a>   |
|                                                | P53801     | PTTG1IP      | <a href="#">754</a>    |
|                                                | Q92900     | UPF1         | <a href="#">5976</a>   |

Additional File 4. Cluster 1

|                                                        |        |          |                        |
|--------------------------------------------------------|--------|----------|------------------------|
| <b>Proteins "Over-represented" in OA chondrocytes</b>  | P36957 | DLST     | <a href="#">1743</a>   |
|                                                        | O75323 | GBAS     | <a href="#">2631</a>   |
|                                                        | P13804 | ETFPA    | <a href="#">2108</a>   |
|                                                        | P13639 | EEF2     | <a href="#">1938</a>   |
|                                                        | P26641 | EEF1G    | <a href="#">1937</a>   |
|                                                        | Q15019 | SEPT2    | <a href="#">4735</a>   |
|                                                        | P40121 | CAPG     | <a href="#">822</a>    |
|                                                        | O43747 | AP1G1    | <a href="#">164</a>    |
|                                                        | P07737 | PFN1     | <a href="#">5216</a>   |
|                                                        | P27348 | YWHAQ    | <a href="#">10971</a>  |
|                                                        | P47756 | CAPZB    | <a href="#">832</a>    |
|                                                        | P63010 | AP2B1    | <a href="#">163</a>    |
|                                                        | Q07065 | CKAP4    | <a href="#">10970</a>  |
|                                                        | Q8NBJ7 | SUMF2    | <a href="#">25870</a>  |
|                                                        | Q32P44 | EML3     | <a href="#">256364</a> |
|                                                        | P63261 | ACTG1    | <a href="#">71</a>     |
|                                                        | Q8N8S7 | ENAH     | <a href="#">55740</a>  |
|                                                        | O60763 | USO1     | <a href="#">8615</a>   |
|                                                        | P62879 | GNB2     | <a href="#">2783</a>   |
|                                                        | P46940 | IQGAP1   | <a href="#">8826</a>   |
|                                                        | Q13200 | PSMD2    | <a href="#">5708</a>   |
|                                                        | P63092 | GNAS     | <a href="#">2778</a>   |
|                                                        | P61619 | SEC61A1  | <a href="#">29927</a>  |
|                                                        | P68032 | ACTC1    | <a href="#">70</a>     |
|                                                        | P54709 | ATP1B3   | <a href="#">483</a>    |
|                                                        | Q96IU4 | ABHD14B  | <a href="#">84836</a>  |
|                                                        | O00203 | AP3B1    | <a href="#">8546</a>   |
|                                                        | P13674 | P4HA1    | <a href="#">5033</a>   |
|                                                        | P63104 | YWHAZ    | <a href="#">7534</a>   |
|                                                        | P21333 | FLNA     | <a href="#">2316</a>   |
|                                                        | P10619 | CTSA     | <a href="#">5476</a>   |
|                                                        | Q9H0E2 | TOLLIP   | <a href="#">54472</a>  |
|                                                        | P30040 | ERP29    | <a href="#">10961</a>  |
| <b>Proteins Uniquely identified in OA chondrocytes</b> | P40227 | CCT6A    | <a href="#">908</a>    |
|                                                        | Q53GQ0 | HSD17B12 | <a href="#">51144</a>  |
|                                                        | P35222 | CTNNB1   | <a href="#">1499</a>   |
|                                                        | O15067 | PFAS     | <a href="#">5198</a>   |
|                                                        | Q9NV96 | TMEM30A  | <a href="#">55754</a>  |
|                                                        | Q13620 | CUL4B    | <a href="#">8450</a>   |
|                                                        | O75396 | SEC22B   | <a href="#">9554</a>   |
|                                                        | Q10472 | GALNT1   | <a href="#">2589</a>   |
|                                                        | O43684 | BUB3     | <a href="#">9184</a>   |
|                                                        | Q16678 | CYP1B1   | <a href="#">1545</a>   |
|                                                        | P78344 | EIF4G2   | <a href="#">1982</a>   |
|                                                        | P18077 | RPL35A   | <a href="#">6165</a>   |

Additional File 4. Cluster 1

| Proteins Uniquely identified in OA chondrocytes |           |                       |
|-------------------------------------------------|-----------|-----------------------|
| O95433                                          | AHSA1     | <a href="#">10598</a> |
| P09619                                          | PDGFRB    | <a href="#">5159</a>  |
| P41252                                          | IARS      | <a href="#">3376</a>  |
| O43795                                          | MYO1B     | <a href="#">4430</a>  |
| P61163                                          | ACTR1A    | <a href="#">10121</a> |
| Q8NBX0                                          | SCCPDH    | <a href="#">51097</a> |
| Q7L2H7                                          | EIF3M     | <a href="#">10480</a> |
| Q07812                                          | BAX       | <a href="#">581</a>   |
| Q12797                                          | ASPH      | <a href="#">444</a>   |
| O43772                                          | SLC25A20  | <a href="#">788</a>   |
| P43353                                          | ALDH3B1   | <a href="#">221</a>   |
| O43865                                          | AHCYL1    | <a href="#">10768</a> |
| O95486                                          | SEC24A    | <a href="#">10802</a> |
| Q9UM54                                          | MYO6      | <a href="#">4646</a>  |
| P13861                                          | PRKAR2A   | <a href="#">5576</a>  |
| P61086                                          | UBE2K     | <a href="#">3093</a>  |
| Q99829                                          | CPNE1     | <a href="#">8904</a>  |
| Q9Y3Q3                                          | TMED3     | <a href="#">23423</a> |
| Q9Y285                                          | FARSA     | <a href="#">2193</a>  |
| Q6DKJ4                                          | NXN       | <a href="#">64359</a> |
| Q9NVI7                                          | ATAD3A    | <a href="#">55210</a> |
| P36969                                          | GPX4      | <a href="#">2879</a>  |
| Q8WWI5                                          | SLC44A1   | <a href="#">23446</a> |
| P52788                                          | SMS       | <a href="#">6611</a>  |
| Q9NRY6                                          | PLSCR3    | <a href="#">57048</a> |
| Q93077                                          | HIST1H2AC | <a href="#">8334</a>  |
| Q9Y3A5                                          | SBDS      | <a href="#">51119</a> |
| P20340                                          | RAB6A     | <a href="#">5870</a>  |
| Q6PGP7                                          | TTC37     | <a href="#">9652</a>  |
| Q8WUJ3                                          | KIAA1199  | <a href="#">57214</a> |
| O00571                                          | DDX3X     | <a href="#">1654</a>  |
| Q6NUK1                                          | SLC25A24  | <a href="#">29957</a> |
| Q9NZU5                                          | LMCD1     | <a href="#">29995</a> |
| P50281                                          | MMP14     | <a href="#">4323</a>  |
| P60228                                          | EIF3E     | <a href="#">3646</a>  |
| Q14192                                          | FHL2      | <a href="#">2274</a>  |
| P49591                                          | SARS      | <a href="#">6301</a>  |
| Q12931                                          | TRAP1     | <a href="#">10131</a> |
| Q86X55                                          | CARM1     | <a href="#">10498</a> |
| Q9UP95                                          | SLC12A4   | <a href="#">6560</a>  |
| P21283                                          | ATP6V1C1  | <a href="#">528</a>   |
| Q9UHQ9                                          | CYB5R1    | <a href="#">51706</a> |
| P05166                                          | PCCB      | <a href="#">5096</a>  |
| P61353                                          | RPL27     | <a href="#">6155</a>  |
| P51858                                          | HDGF      | <a href="#">3068</a>  |

Additional File 4. Cluster 1

|                                                            |          |                       |                        |
|------------------------------------------------------------|----------|-----------------------|------------------------|
| <b>Proteins Uniquely identified in<br/>OA chondrocytes</b> | Q16774   | GUK1                  | <a href="#">2987</a>   |
|                                                            | Q5T5C0   | STXBP5                | <a href="#">134957</a> |
|                                                            | Q92572   | AP3S1                 | <a href="#">1176</a>   |
|                                                            | Q99470   | SDF2                  | <a href="#">6388</a>   |
|                                                            | P61225   | RAP2B                 | <a href="#">5912</a>   |
|                                                            | Q9Y316   | MEMO1                 | <a href="#">51072</a>  |
|                                                            | Q7Z3B1   | NEGR1                 | <a href="#">257194</a> |
|                                                            | O43681   | ASNA1                 | <a href="#">439</a>    |
|                                                            | P51553   | IDH3G                 | <a href="#">3421</a>   |
|                                                            | Q9Y305   | ACOT9                 | <a href="#">23597</a>  |
|                                                            | P36639   | NUDT1                 | <a href="#">4521</a>   |
|                                                            | O14964   | HGS                   | <a href="#">9146</a>   |
|                                                            | Q13283   | G3BP1                 | <a href="#">10146</a>  |
|                                                            | Q9P2J5   | LARS                  | <a href="#">51520</a>  |
|                                                            | P61020   | RAB5B                 | <a href="#">5869</a>   |
|                                                            | Q08378   | GOLGA3                | <a href="#">2802</a>   |
|                                                            | O43143   | DHX15                 | <a href="#">1665</a>   |
|                                                            | P45974   | USP5                  | <a href="#">8078</a>   |
|                                                            | P62917   | RPL8                  | <a href="#">6132</a>   |
|                                                            | P24844   | MYL9                  | <a href="#">10398</a>  |
|                                                            | P55290   | CDH13                 | <a href="#">1012</a>   |
|                                                            | Q9Y2Q3   | GSTK1                 | <a href="#">373156</a> |
|                                                            | P29692   | EEF1D                 | <a href="#">1936</a>   |
|                                                            | Q9P2R7   | SUCLA2                | <a href="#">8803</a>   |
|                                                            | P30533   | LRPAP1                | <a href="#">4043</a>   |
|                                                            | P62191   | PSMC1                 | <a href="#">5700</a>   |
|                                                            | Q96AE4   | FUBP1                 | <a href="#">8880</a>   |
|                                                            | P30711   | GSTT1                 | <a href="#">2952</a>   |
|                                                            | Q13488   | TCIRG1                | <a href="#">10312</a>  |
|                                                            | O15400   | STX7                  | <a href="#">8417</a>   |
|                                                            | O14828   | SCAMP3                | <a href="#">10067</a>  |
|                                                            | Q6UW02   | CYP20A1               | <a href="#">57404</a>  |
|                                                            | P62829   | RPL23                 | <a href="#">9349</a>   |
|                                                            | Q07955   | SRSF1                 | <a href="#">6426</a>   |
|                                                            | O75431   | MTX2                  | <a href="#">10651</a>  |
|                                                            | Q14444   | CAPRIN1               | <a href="#">4076</a>   |
|                                                            | Q9Y259   | CHKB                  | <a href="#">1120</a>   |
|                                                            | Q9UNL2   | SSR3                  | <a href="#">6747</a>   |
|                                                            | Q9ULC3   | RAB23                 | <a href="#">51715</a>  |
|                                                            | P54619   | PRKAG1                | <a href="#">5571</a>   |
| P31689                                                     | DNAJA1   | <a href="#">3301</a>  |                        |
| Q6YN16                                                     | HSDL2    | <a href="#">84263</a> |                        |
| P27635                                                     | RPL10    | <a href="#">6134</a>  |                        |
| Q9H993                                                     | C6orf211 | <a href="#">79624</a> |                        |
| P11172                                                     | UMPS     | <a href="#">7372</a>  |                        |
| Q92692                                                     | PVRL2    | <a href="#">5819</a>  |                        |

Additional File 4. Cluster 1

| Proteins Uniquely identified in OA chondrocytes |        |           |                        |
|-------------------------------------------------|--------|-----------|------------------------|
|                                                 | Q9UHB6 | LIMA1     | <a href="#">51474</a>  |
|                                                 | O95168 | NDUFB4    | <a href="#">4710</a>   |
|                                                 | O43617 | TRAPPC3   | <a href="#">27095</a>  |
|                                                 | Q9BY32 | ITPA      | <a href="#">3704</a>   |
|                                                 | P61758 | VBP1      | <a href="#">7411</a>   |
|                                                 | Q9HBH5 | RDH14     | <a href="#">57665</a>  |
|                                                 | Q96EM0 | L3HYPDH   | <a href="#">112849</a> |
|                                                 | Q9UHX1 | PUF60     | <a href="#">22827</a>  |
|                                                 | Q8NF37 | LPCAT1    | <a href="#">79888</a>  |
|                                                 | Q9H3H3 | C11orf68  | <a href="#">83638</a>  |
|                                                 | O96011 | PEX11B    | <a href="#">8799</a>   |
|                                                 | O00142 | TK2       | <a href="#">7084</a>   |
|                                                 | Q9NRN7 | AASDHPPT  | <a href="#">60496</a>  |
|                                                 | P50552 | VASP      | <a href="#">7408</a>   |
|                                                 | P09669 | COX6C     | <a href="#">1345</a>   |
|                                                 | P63208 | SKP1      | <a href="#">6500</a>   |
|                                                 | P36404 | ARL2      | <a href="#">402</a>    |
|                                                 | Q9BQ69 | MACROD1   | <a href="#">28992</a>  |
|                                                 | P55036 | PSMD4     | <a href="#">5710</a>   |
|                                                 | P51114 | FXR1      | <a href="#">8087</a>   |
|                                                 | Q96EU7 | C1GALT1C1 | <a href="#">29071</a>  |
|                                                 | Q9Y2S7 | POLDIP2   | <a href="#">26073</a>  |
|                                                 | P17302 | GJA1      | <a href="#">2697</a>   |
|                                                 | Q9HB90 | RRAGC     | <a href="#">64121</a>  |
|                                                 | Q96A33 | CCDC47    | <a href="#">57003</a>  |
|                                                 | Q8WXF1 | PSPC1     | <a href="#">55269</a>  |
|                                                 | O95297 | MPZL1     | <a href="#">9019</a>   |
|                                                 | Q6GMV2 | SMYD5     | <a href="#">10322</a>  |
